# Supplementary material for: Experimental study on pretreatment effects of [BMIM]HSO4/ethanol on the thermal behavior of cellulose
Source: Royal Society of Chemistry journal article supplement (doi:10.1039/d2ra00876a), 2022-01-01

**Figure S11.** Recovery yields of PCEL under different conditions.

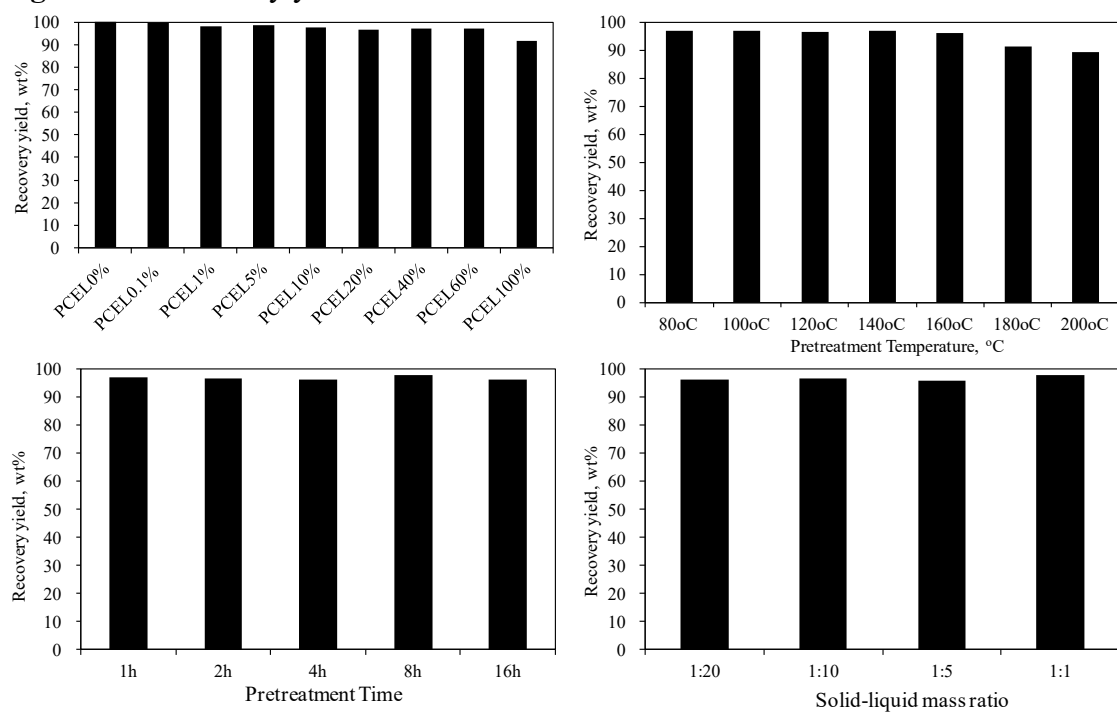

**Figure SI2.** FTIR spectra(a) and Raman spectra(b) of MCEL and PCEL0%-PCEL60% at 140 °C.

(a) FTIR spectra

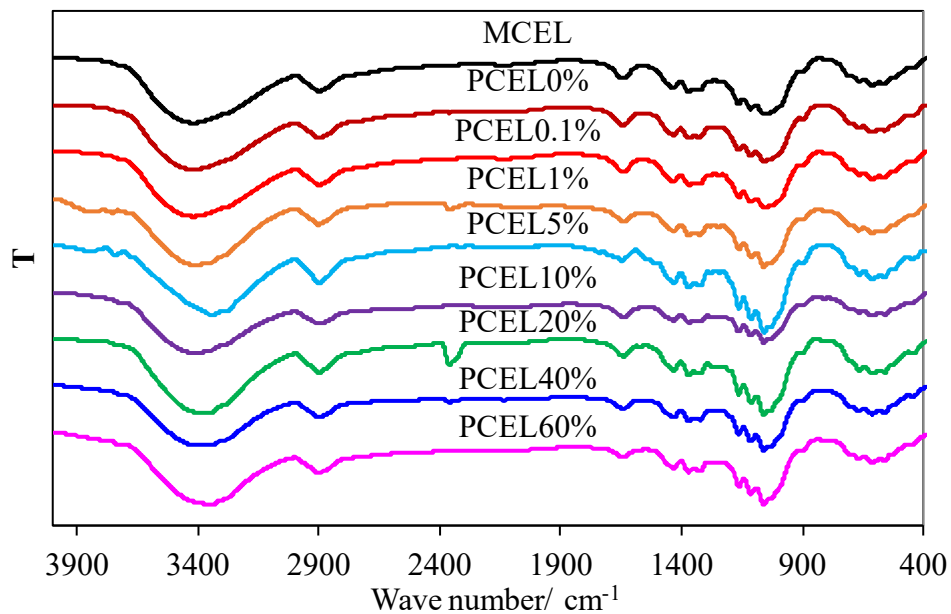

(b) Raman spectra

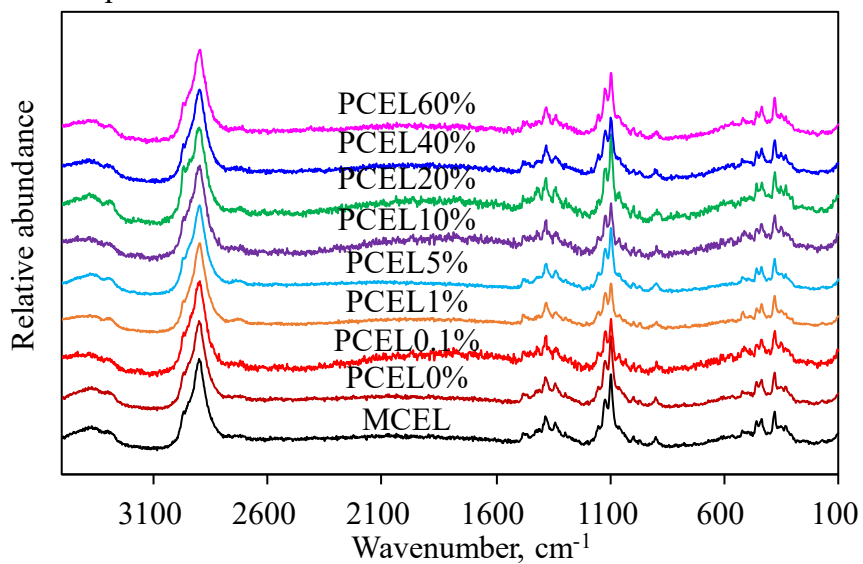

**Figure SI3.** Plots of temperature vs loss weight of MCEL and PCEL0%-PCEL100% under different heating rate.

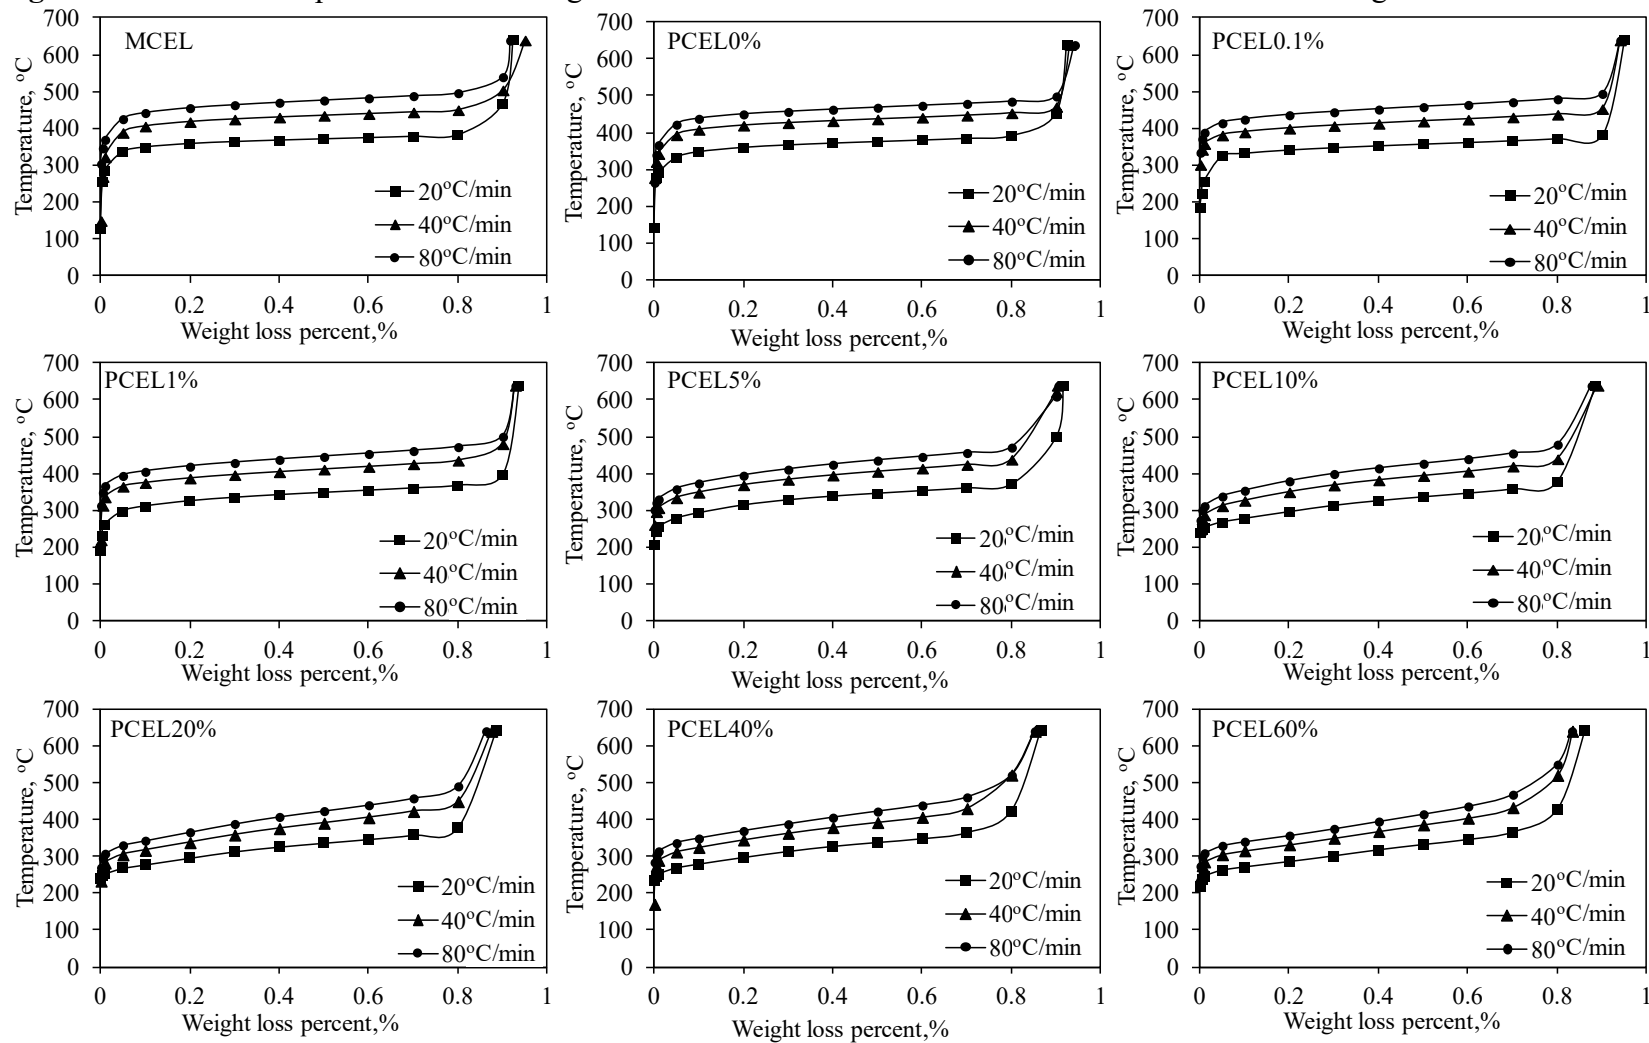

**Figure SI4.** The repetitive-use performance of [BMIM]HSO<sub>4</sub>/ethanol solvent.

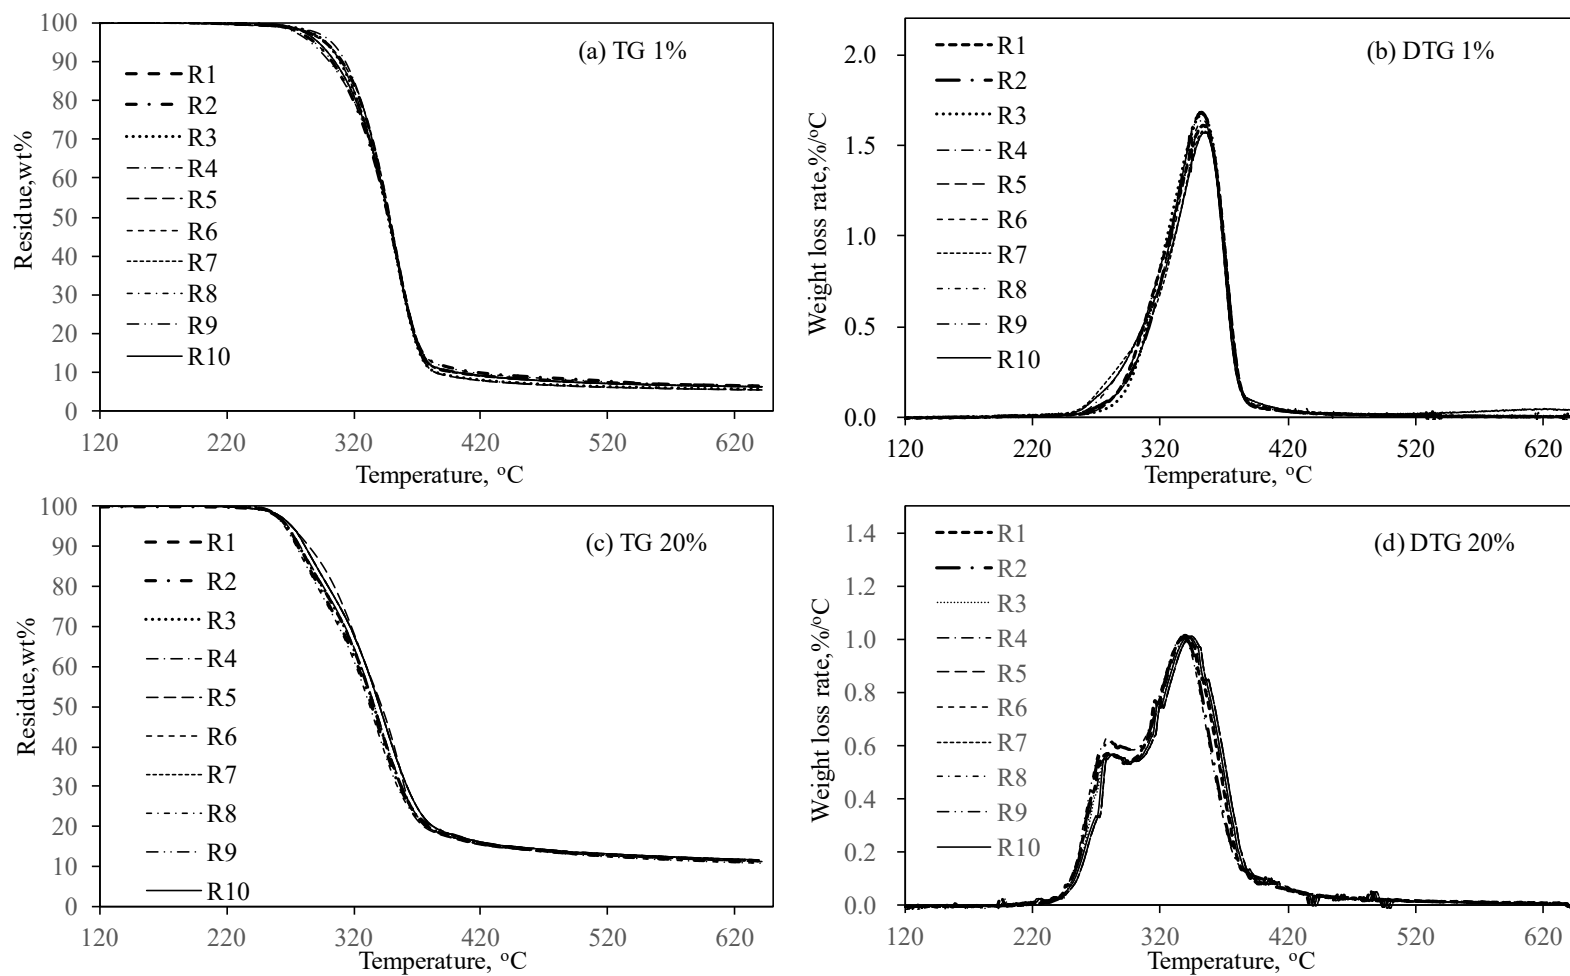

Supplement: d2ra00876a1.pdf [file d2ra00876a1.pdf]
